# Supplementary material
Source: PubMed Central journal article supplement (PMC3710146)
Supplement: NIHMS480841-supplement-Suppl_Fig_1.pdf [file NIHMS480841-supplement-Suppl_Fig_1.pdf]

## Supplementary Figures

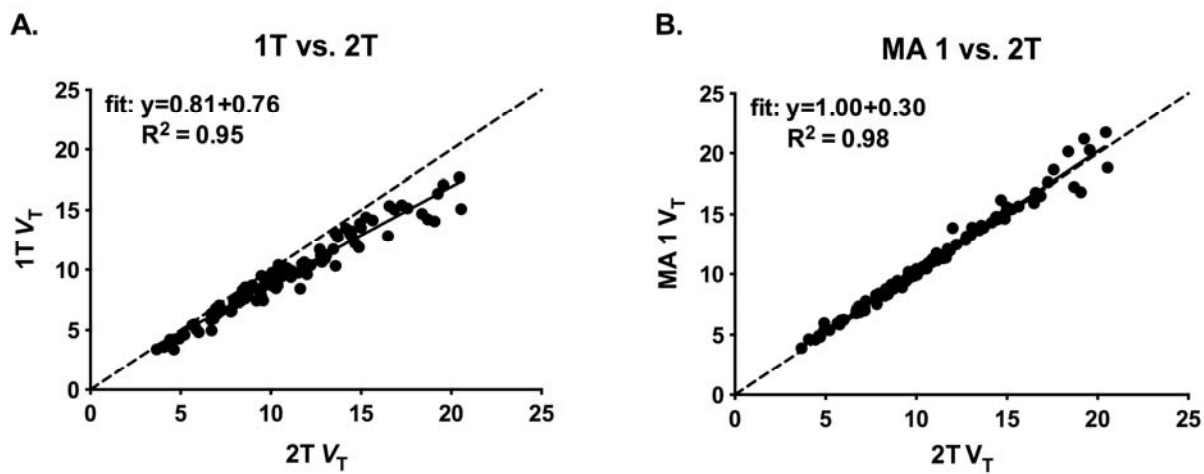

**Suppl. Fig. 1.** Model comparison of 1T and MA1 vs. 2T for [ $^{11}\text{C}$ ]ABP688  $V_T$  for all conditions and ROIs. A) 1T underestimated 2T  $V_T$  values and B) MA1 values were in very good agreement with 2T  $V_T$  values as indicated with the regression fit (solid line). The identity plot (dashed line) was added for reference. Only  $V_T$  estimates with percent standard error <20% were used in these comparisons.
