# Supplementary material
Source: PubMed Central journal article supplement (PMC3710146)
Supplement: NIHMS480841-supplement-Suppl_Fig_2.pdf [file NIHMS480841-supplement-Suppl_Fig_2.pdf]

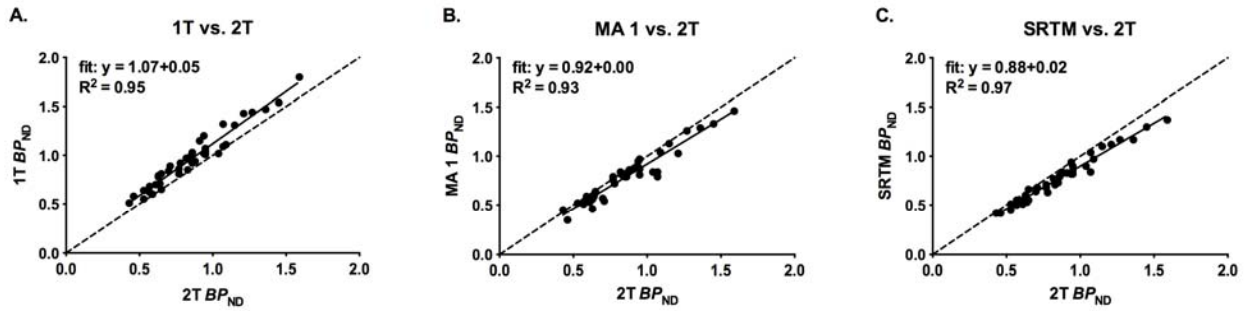

**Suppl. Fig. 2.** Model comparison of 1T, MA1, and SRTM vs. 2T for [ $^{11}\text{C}$ ]ABP688  $BP_{\text{ND}}$  for all conditions and ROIs. A) 1T slightly overestimated 2T  $BP_{\text{ND}}$  values, B) MA1 slightly underestimated 2T  $BP_{\text{ND}}$ , and C) SRTM underestimated 2T  $BP_{\text{ND}}$  indicated with the regression fit (solid line). The identity plot (dashed line) was added for reference. Only  $BP_{\text{ND}}$  estimates with percent standard error <20% were used in these comparisons.
